# Supplementary material for: Design of Aerogels, Cryogels and Xerogels of Alginate: Effect of Molecular Weight, Gelation Conditions and Drying Method on Particles’ Micromeritics
Source: MDPI journal article supplement (doi:10.3390/molecules24061049), 2019-03-17
Supplement: s1 [file s1]

Article

# Design of aerogels, cryogels and xerogels of alginate: Effect of molecular weight, gelation conditions and drying method on particles micromeritics

**Table 1.** Skeletal density ( $\text{g}/\text{cm}^3$ )  $\pm$  SD of alginate aerogels.

| Aerogel | $\rho$ Skeletal ( $\text{g}/\text{cm}^3$ ) |                 |
|---------|--------------------------------------------|-----------------|
|         | Hydrogel                                   | Alcogel         |
| MMW125  | $1.40 \pm 0.02$                            | $1.44 \pm 0.03$ |
| MMW150  | $1.33 \pm 0.01$                            | $1.41 \pm 0.03$ |
| MMW200  | $1.37 \pm 0.03$                            | $1.46 \pm 0.04$ |
| MMW225  | $1.38 \pm 0.06$                            | $1.50 \pm 0.05$ |
| HMW125  | $1.33 \pm 0.06$                            | $1.44 \pm 0.02$ |
| HMW150  | $1.48 \pm 0.03$                            | $1.50 \pm 0.03$ |
| HMW200  | $1.56 \pm 0.02$                            | $1.52 \pm 0.02$ |
| HMW225  | $1.52 \pm 0.02$                            | $1.52 \pm 0.02$ |

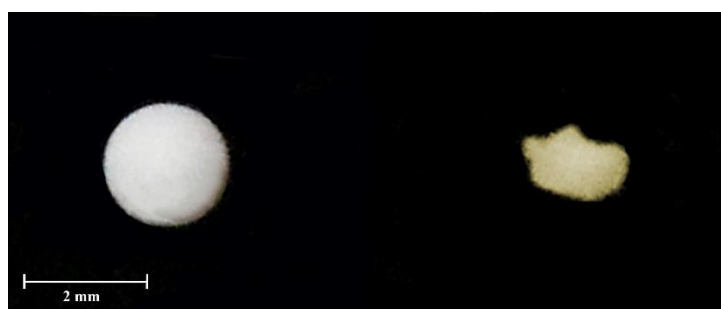

**Figure 1.** Aerogel (left) and cryogel (right) beads.
